# Supplementary material
Source: MDPI journal article supplement (https://www.mdpi.com/2071-1050/11/22/6212)
Supplement: s1 [file s1]

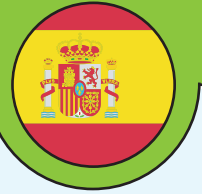

**Before  
(Prevention)**

**Compulsory insurance coverage extension for multiperils:**

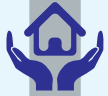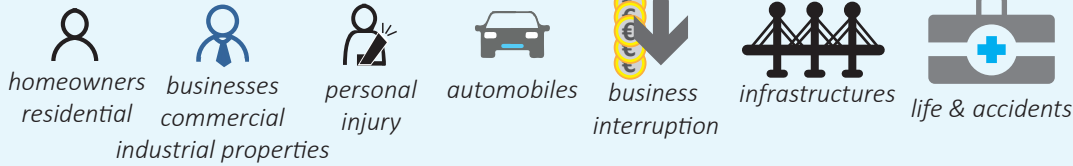

policyholders

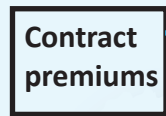

**bundled premium**

compulsory coverage extension for extraordinary risks on the insured

**Private insurance companies**

surcharge

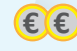

(keep 5% commission to themselves)

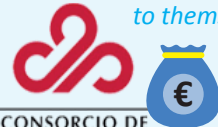

CONSORCIO DE COMPENSACION DE SEGUROS (~€8bn)

**Event  
occurrence**

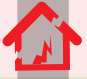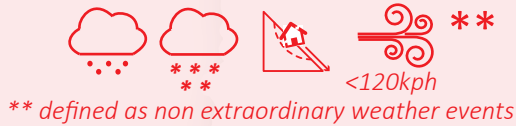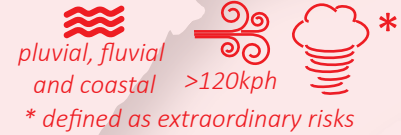

**After  
(Recovery)**

**Private insurance companies**

pay compensation for non-extraordinary hazards defined by the insurance policy

direct compensation

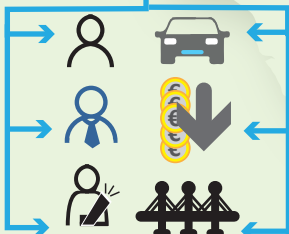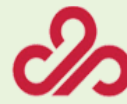

CONSORCIO DE COMPENSACION DE SEGUROS

pays compensation for extraordinary risks

claims management

The loss adjusters' assesses the cost of the damages

direct compensation deductibles fixed by the Order ECC/2845/2015

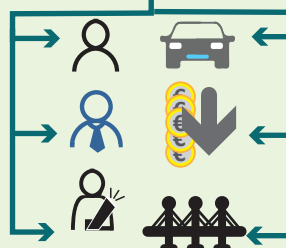

if losses exceed CCS' ability to pay:

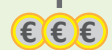

**State intervenes as last resort**

time
