# Supplementary material
Source: MDPI journal article supplement (https://www.mdpi.com/2071-1050/11/22/6212)
Supplement: s1 [file s1]

# How well do you know European natural hazard insurance systems?

## COUNTRY FACT SHEET NETHERLANDS

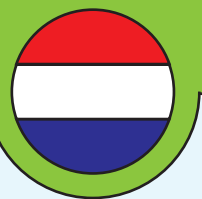

**Before (Prevention)** The insurance sector has a policy not to provide flood insurance  
Compensation is possible through an ad-hoc State intervention

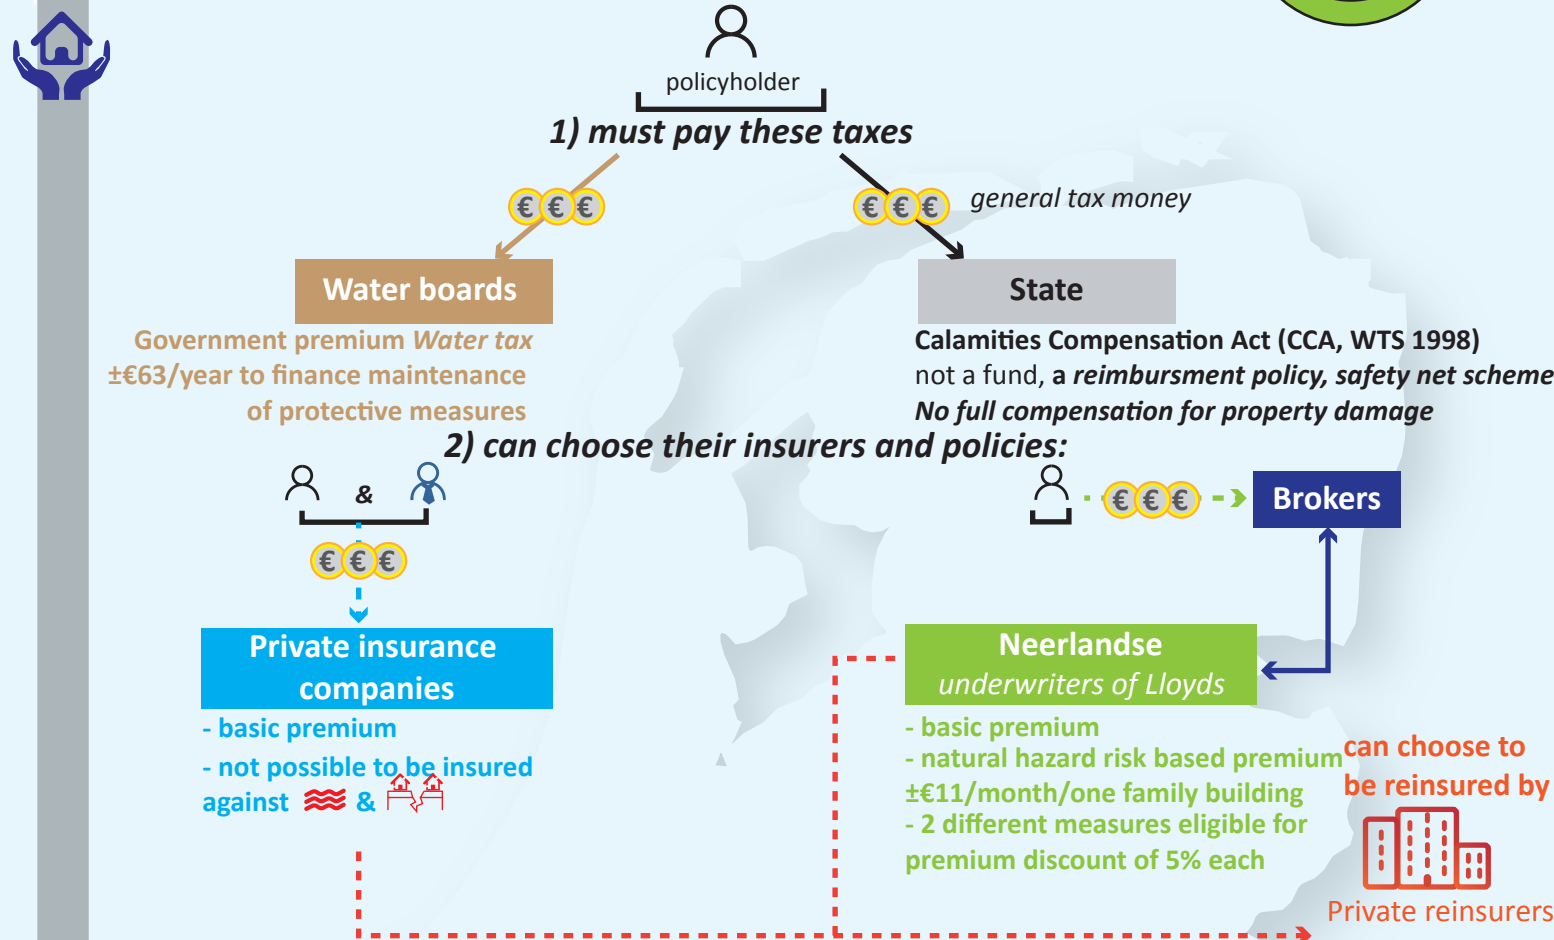

**Event occurrence**

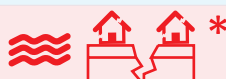

\*flooding of freshwater, earthquakes and "other disasters at least of comparable order" are defined in Article 1 of the Security Regional Act

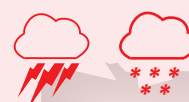

list of perils fixed by the policy

**After (Recovery)** Event recognized as a "disaster" by Royal Decree of the Ministry of Justice and Security?

**NO**

**YES: Royal decree**

applicable only for damage that is *uninsurable, unavoidable, non-coverable*

The loss adjuster assesses damage cost (Private insurer agent employed by the government)

Political decision to define the % of compensation (law: no full compensation, restoration reconstruction)

citizens, businesses, government, churches, associations, foundations & agriculture

policyholder have to cope with the losses by themselves or relying on their insurance contract

**Compensation for perils covered by the policy**

The claims adjuster assesses the cost of the damages

**Private insurance companies**

**Neerlandse**

compensation/deductibles based on the policy

**Brokers**

time
