# Supplementary material
Source: MDPI journal article supplement (https://www.mdpi.com/2071-1050/11/22/6212)
Supplement: s1 [file s1]

Archive with 11 entries (11 files):
- CountryFactSheet_Denmark.pdf
- CountryFactSheet_France_CCR.pdf
- CountryFactSheet_Germany_GDV.pdf
- CountryFactSheet_Italy.pdf
- CountryFactSheet_Netherlands_FF_IRSTEA.pdf
- CountryFactSheet_Norway.pdf
- CountryFactSheet_Romania.pdf
- CountryFactSheet_Slovenia.pdf
- CountryFactSheet_Spain.pdf
- CountryFactSheet_Sweden.pdf
- CountryFactSheet_UK.pdf
