# Supplementary material
Source: MDPI journal article supplement (https://www.mdpi.com/2071-1050/11/22/6212)
Supplement: s1 [file s1 › CountryFactSheet_Denmark.pdf]

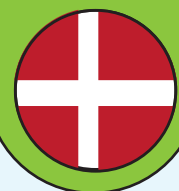

**Before (Prevention)** Semi-voluntary insurance with a public disaster fund financed by tax-payers' money

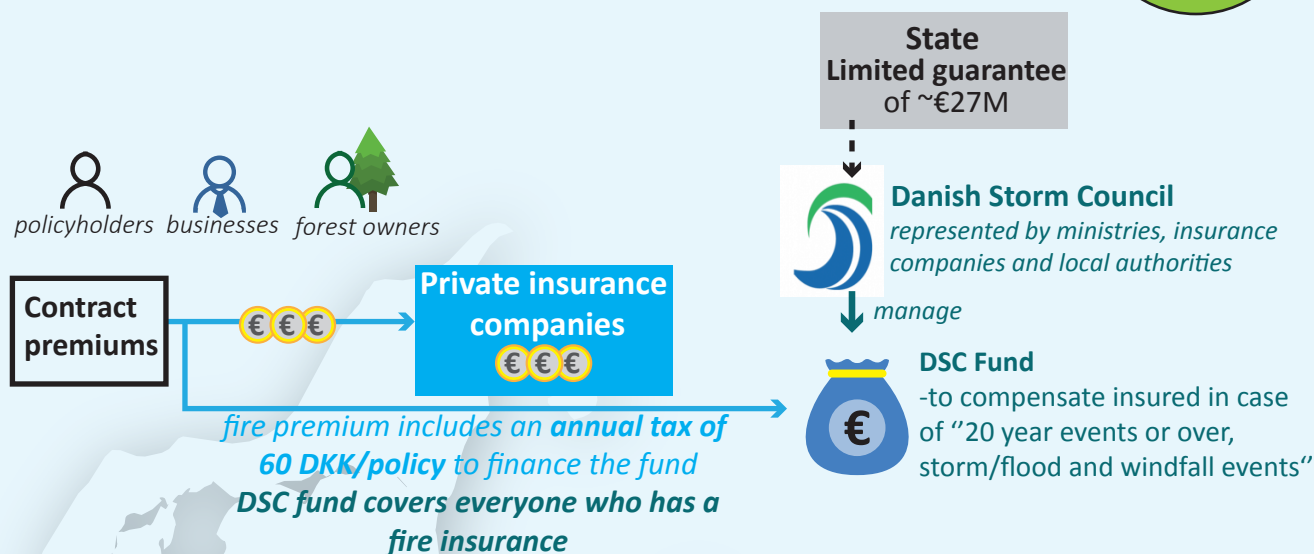

**Event occurrence**

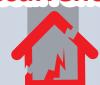

Storm surge (covered if it is a "20 year events or over" recognized by a DSC declaration)

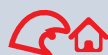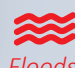

Floods (from waterways & lakes)

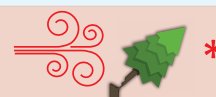

Windfall

\* The Danish Storm Council recognizes these 3 types of natural catastrophes

**After (Recovery)**

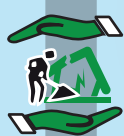

**The private insurer refuses to cover the claims due to floods or storm surge**

policyholders businesses  
**flood/storm surge damage claims request to the DSC only if they are fire insured**

The claims adjusters' assesses the cost of the damages

**DSC pays compensation, fixes deductible and registered damage into the BBR building and housing register**

policyholders businesses

**Disaster relief scheme**

forest owners

**apply to the DSC for a subsidy (to finance costs of cleaning up and replanting) must be insured against storm damage to trees and the contract must cover the entire area**

The claims adjusters' assesses the cost of the damages

**DSC pays subsidy tax-deductible fixed by the DSC**

forest owners

time
