# Supplementary material
Source: MDPI journal article supplement (https://www.mdpi.com/2071-1050/11/22/6212)
Supplement: s1 [file s1 › CountryFactSheet_Germany_GDV.pdf]

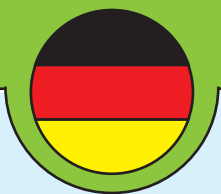

Before  
(Prevention)

Voluntary, but "highly-recommended insurance"

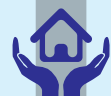

PUBLIC PROTECTION

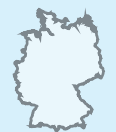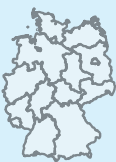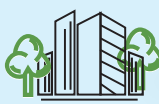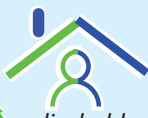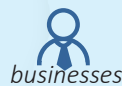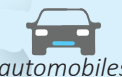

tax-payers money finance  
protective measures

policyholder

businesses

automobiles

- **State** - responsible for *coordinating large scale protective measures* e.g., "National Flood Protection Programme"
- **Bundesländer** - responsible for *large scale protective measures and implementation of the EU Directives as well as voluntary campaigns to raise natural disasters risk awareness*
- **Cities and towns** - locally responsible for *land-use planning* including *analysis of vulnerabilities and small scale protective measures*
- **Individuals** - responsible for the *individual protection of their houses* (e.g., structural measures)
  - *voluntary subscription to insurance policy*
  - *risk-based pricing* (all perils; based on risk zone mapping, individual protective measures and climate change vulnerability)

basic premium  
(storm & hail)

~€220/year  
/one family building

optional natural catastrophes  
(floods & others) premium

~€70-170/year  
/one family building

If policyholders are under the regulation of the "Sozialgesetzbuch II", Social Security Code: the government helps them to pay their premiums

INDIVIDUAL PROTECTION

Private insurance  
companies

Homeowners have implemented  
individual protective measures?

NO:

no discounts  
on premiums

YES:

incentives on premiums/  
lower deductibles

- **Private insurance companies** - cover the remaining risks

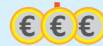

can choose to  
be reinsured by Private reinsurers

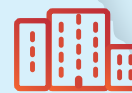

Event occurrence

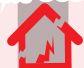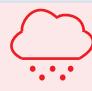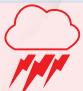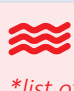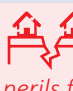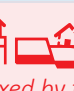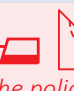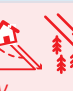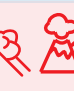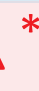

\*

\*list of perils fixed by the policy

After  
(Recovery)

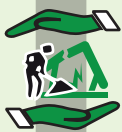

No State compensations  
beyond emergency aid

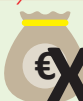

Private insurance  
companies

compensation based on the policy  
deductible fixed by the contract

policyholder

reinsure insurers in  
accordance with the policy

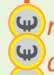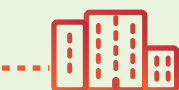

Private reinsurers

time
