# Supplementary material
Source: MDPI journal article supplement (https://www.mdpi.com/2071-1050/11/22/6212)
Supplement: s1 [file s1 › CountryFactSheet_Norway.pdf]

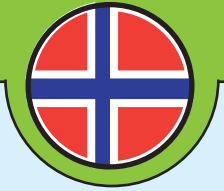

**Before  
(Prevention)**

Natural hazards coverage is - by law - connected to the fire insurance  
Data sharing prevention-based with law regulation and Government support

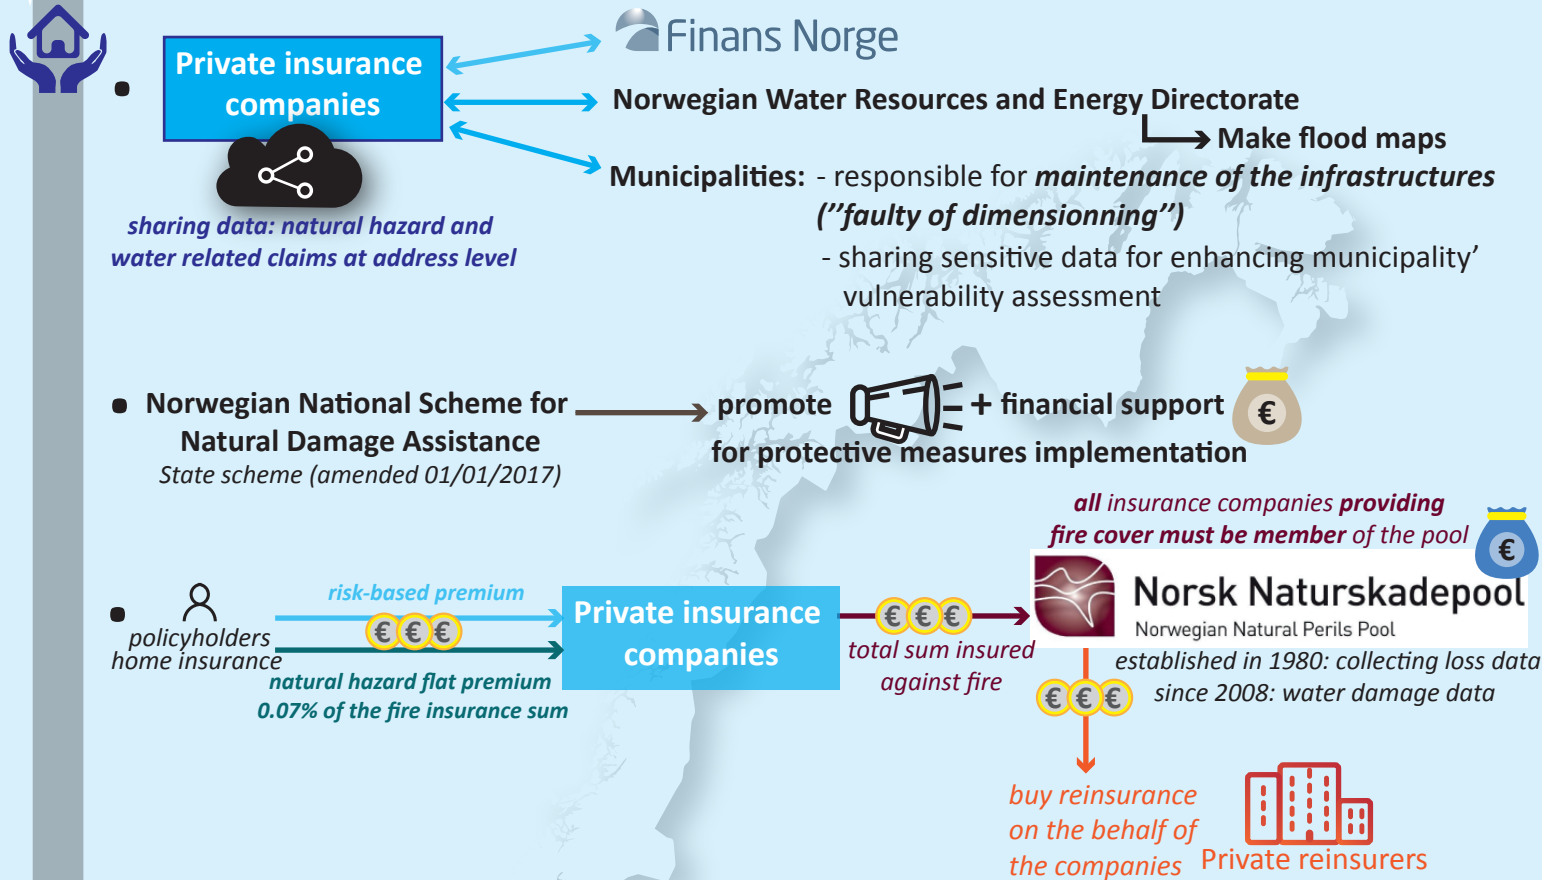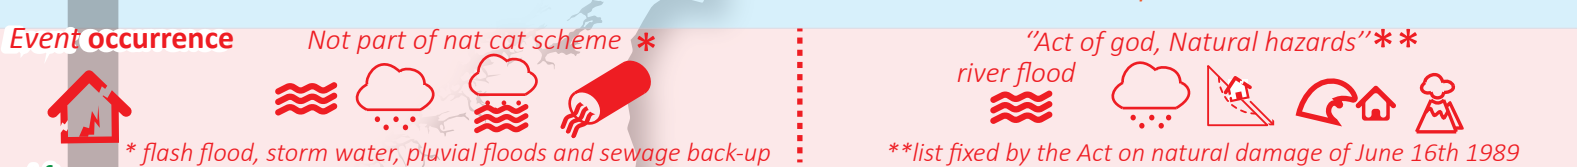

**After  
(Recovery)**

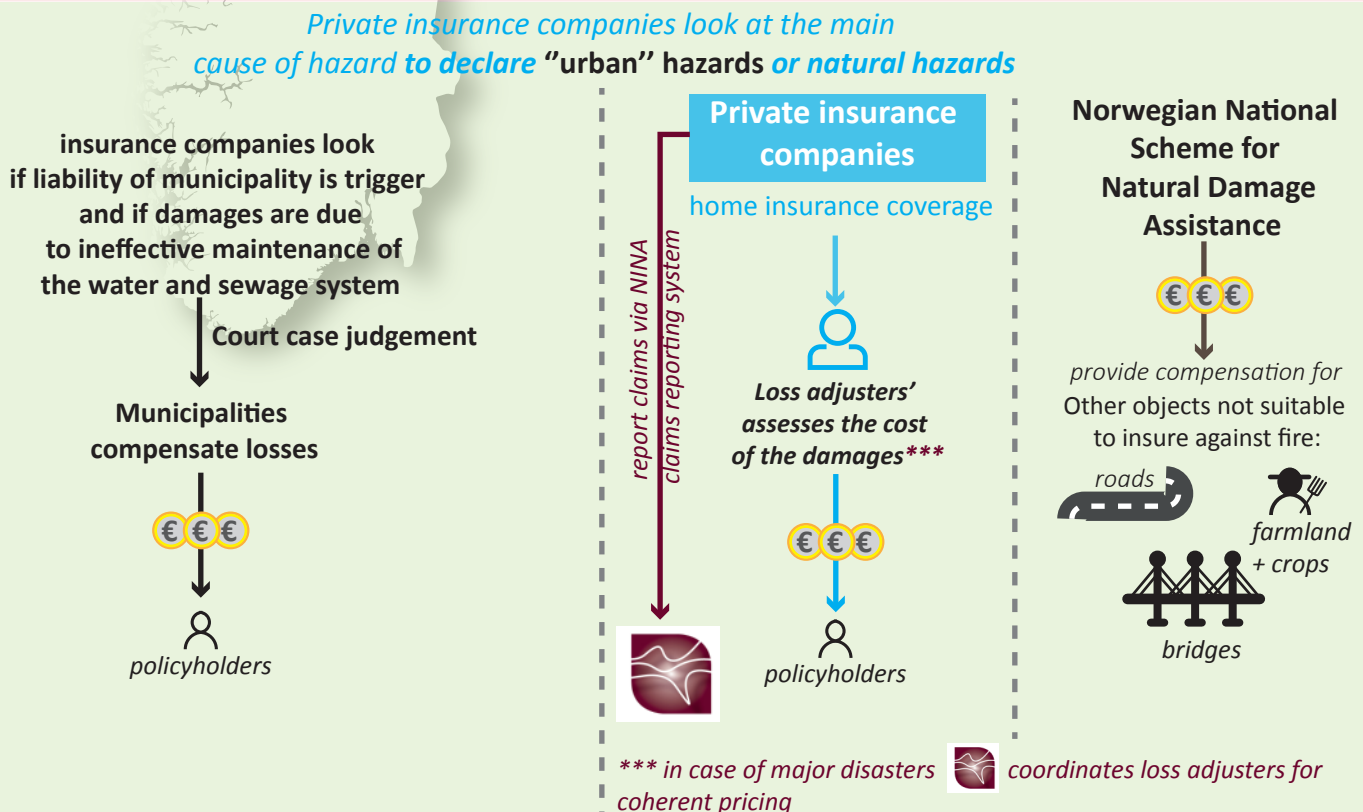

time
