# Supplementary material
Source: MDPI journal article supplement (https://www.mdpi.com/2071-1050/11/22/6212)
Supplement: s1 [file s1 › CountryFactSheet_Slovenia.pdf]

# How well do you know European natural hazard insurance systems?

## COUNTRY FACT SHEET SLOVENIA

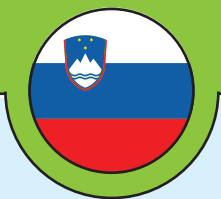

Before  
(Prevention)

A voluntary private insurance with an ad-hoc State intervention for natural/legal persons insured or not

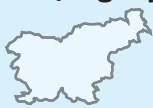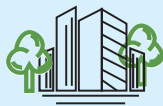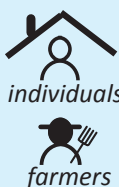

Private insurance companies

- **State** (Slovenian Water Agencies) - preparation and implementation of the Flood Protection Plans, risk assessment, selection of the measures and get the budget (*from own State budget and other European funds*) (*legal obligation but not always implemented*)

- **Municipalities** - responsible for harmonizing Municipal Spatial Plan with Flood Protection Plan

- **Individuals** - targets of the communication to raise their risk awareness  
**Voluntary insurance coverage**  
**market-based premiums/deductibles for fire and natural hazards coverage**

€€€ ~€165/year/one family building

- **Private insurance companies**

can refuse to cover properties and agricultural areas

can choose to be reinsured by Private reinsurers

Event occurrence

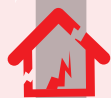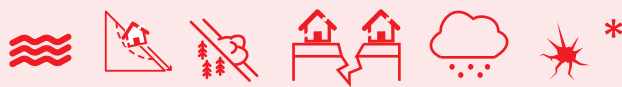

**Administration for the Civil Protection and Disaster Relief (ACPDR)** ← cooperation → **Municipalities**  
during the event occurrence the ACPDR both ensures protection of properties and people within the 32 municipalities (rescue services)

\*natural disasters are defined within the insurance contract

After  
(Recovery)

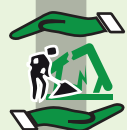

Private insurance companies

Law on the elimination of consequences of natural disasters  
define the conditions of allocation of the national budget

damage assessment by the ACPDR

Damages ( only) exceed 0.3‰ of the national budget income/year  
The government approves (or not)

unlock

Water Rehabilitation Program

€€€

Are insured?

**YES:**

€€€

they will receive both State/EUSF and private insurance compensation /deductible based on the policy

**NO:**

€€€

they will receive only State and EUSF compensations

European Union Solidarity Fund (EUSF)

€€€

State

€€€

Private reinsurers reinsure insurers in accordance with the policy

time
