# Supplementary material
Source: MDPI journal article supplement (https://www.mdpi.com/2071-1050/11/22/6212)
Supplement: s1 [file s1 › CountryFactSheet_Sweden.pdf]

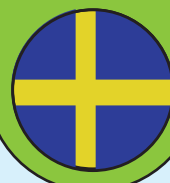

### Before (Prevention)

#### Semi-voluntary private bundled indemnity insurance

- **State** - allocates *fund dedicated to preventive measures* (~40 million Swedish kronor/year)  
**Government Financing Swedish Environmental Institutes**

Public-private partnership  
for implementing  
protective measures

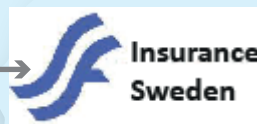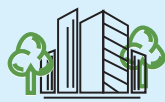

- **Municipalities** - responsible for *water services, dimensioning, maintenance of the pipes*

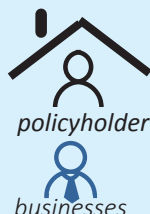

- **Individuals** - *voluntary subscription to insurance contract*; natural catastrophe insurance coverage is a **mortgage requirement for individuals and professionals** *risk-based premium* (based on risk exposure and structural measures)  
 ~€1.300/year/one family building

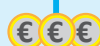

Private insurance  
companies

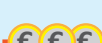

can choose to  
be reinsured by Private reinsurers

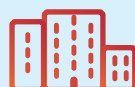

### Event occurrence

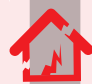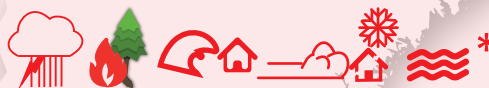

*\*list of perils, natural hazards' definition and thresholds are fixed by the policy*

### After (Recovery)

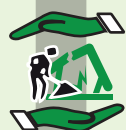

- **No State compensations**
- **Municipalities** - strict **liability** if responsibility is established: *have to compensate damage*

- **Private insurance companies** → compensation based on the policy  
*risk reduction incentive based on deductibles*

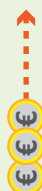

reinsure insurers in  
accordance with the policy

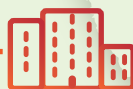

Private reinsurers

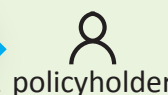

time
