# Supplementary material
Source: MDPI journal article supplement (https://www.mdpi.com/2071-1050/11/22/6212)
Supplement: s1 [file s1 › CountryFactSheet_UK.pdf]

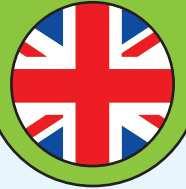

Before  
(Prevention)

Voluntary private insurance with a reinsurance risk pooling

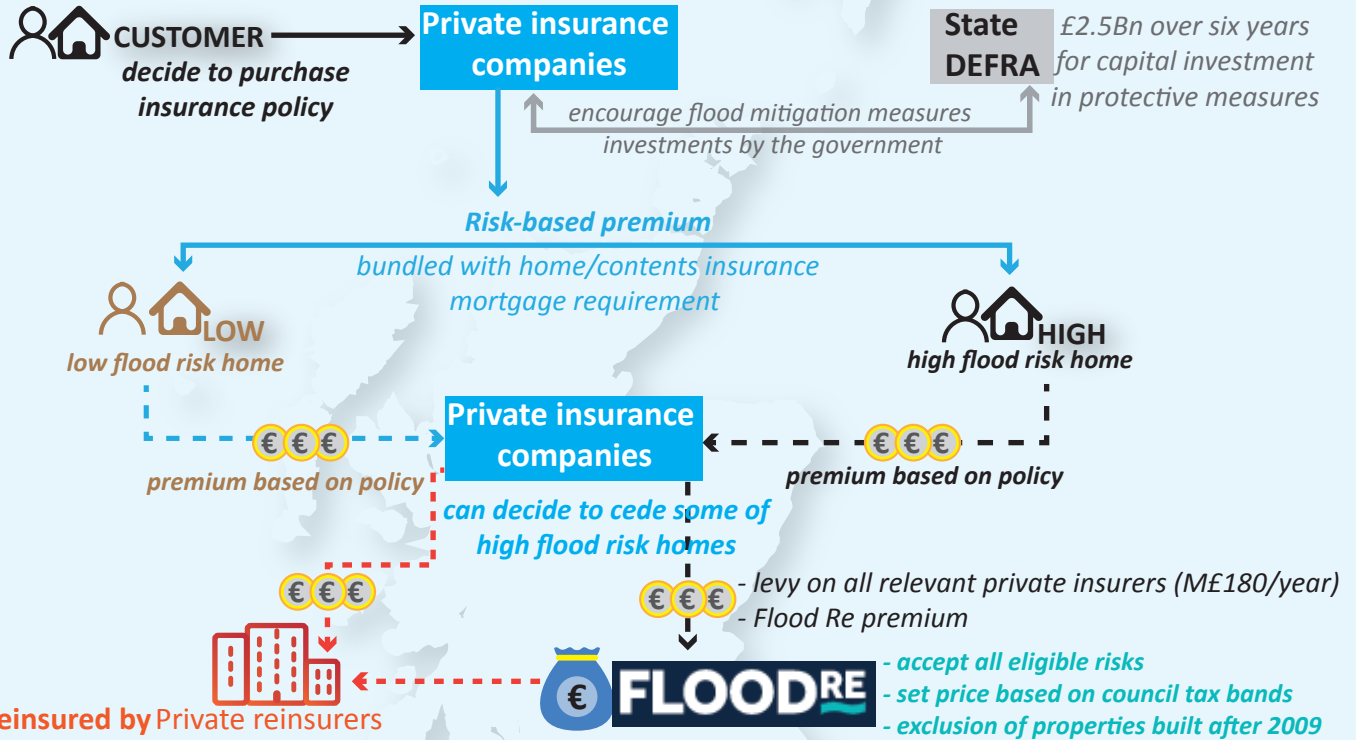

Event  
occurrence

\*list of perils defined by the policy

\*\*flood hazard only

After  
(Recovery)

Compensation for: flooded homes

Compensation for: flooded homes

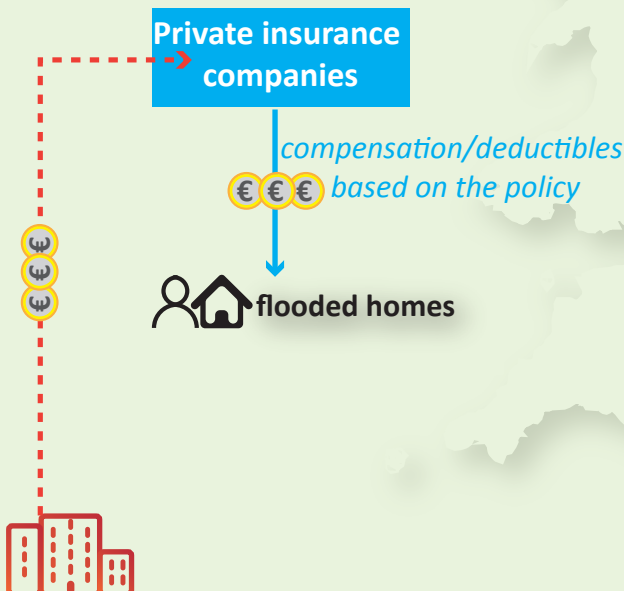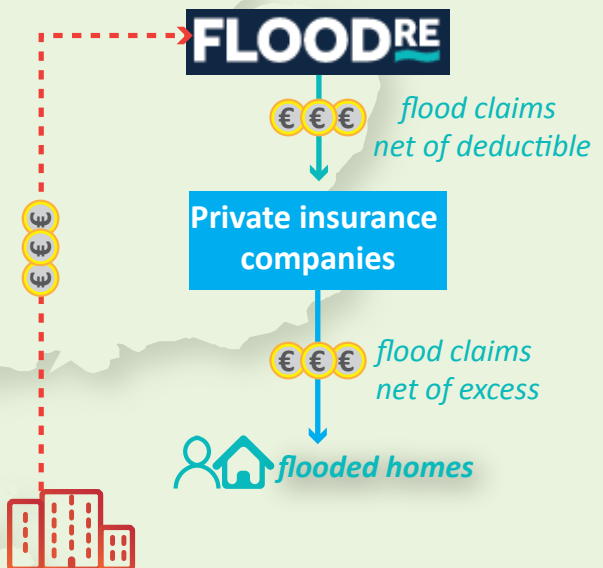

time
